# Supplementary material for: Fabrication of oxidase-like hollow MnCo2O4 nanofibers and their sensitive colorimetric detection of sulfite and l-cysteine
Source: Royal Society of Chemistry journal article supplement (doi:10.1039/c7qi00458c), 2017-01-01
Supplement: c7qi00458c1.pdf [file c7qi00458c1.pdf]

## **Electronic Supplementary Information**

### **Fabrication of oxidase-like hollow $\text{MnCo}_2\text{O}_4$ nanofibers and their sensitive colorimetric detection of sulfite and L-cysteine**

Mu Gao, Xiaofeng Lu,\* Maoqiang Chi, Sihui Chen and Ce Wang\*

*Alan G. MacDiarmid Institute, College of Chemistry, Jilin University,  
Changchun, 130012, P. R. China.*

*\*E-mail: [xflu@jlu.edu.cn](mailto:xflu@jlu.edu.cn); [cwang@jlu.edu.cn](mailto:cwang@jlu.edu.cn)*

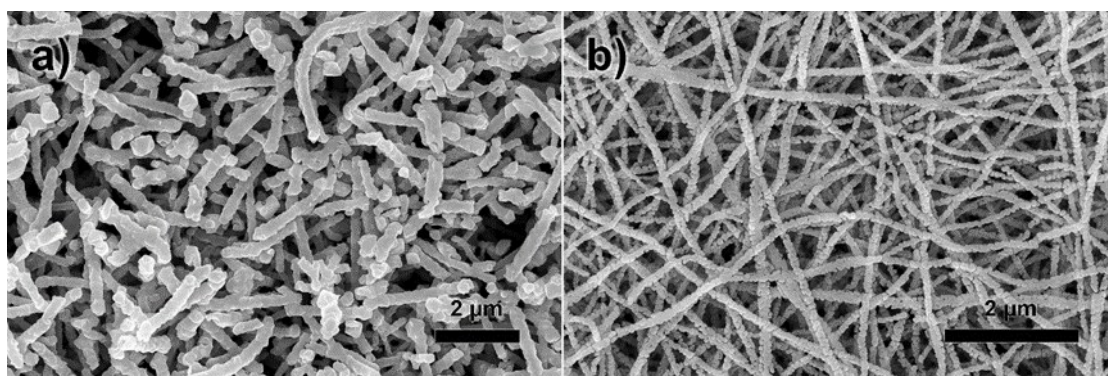

**Figure S1.** SEM images of (a)  $\text{Mn}_2\text{O}_3$  NFs and (b)  $\text{Co}_3\text{O}_4$  NFs that are synthesized via an electrospinning followed by calcination process. The proportion of PVP is 8.8 wt% during the electrospinning process and the calcination temperature is 550 °C.

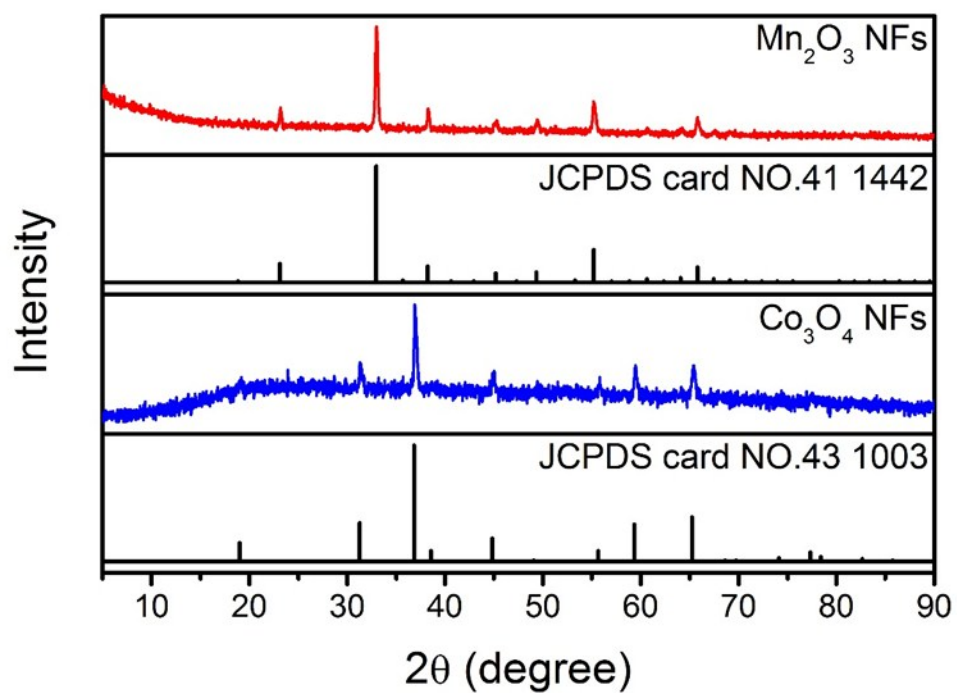

**Figure S2.** XRD patterns of  $\text{Mn}_2\text{O}_3$  NFs and  $\text{Co}_3\text{O}_4$  NFs that are synthesized via an electrospinning followed by calcination process. The proportion of PVP is 8.8 wt% during the electrospinning process and the calcination temperature is 550 °C.

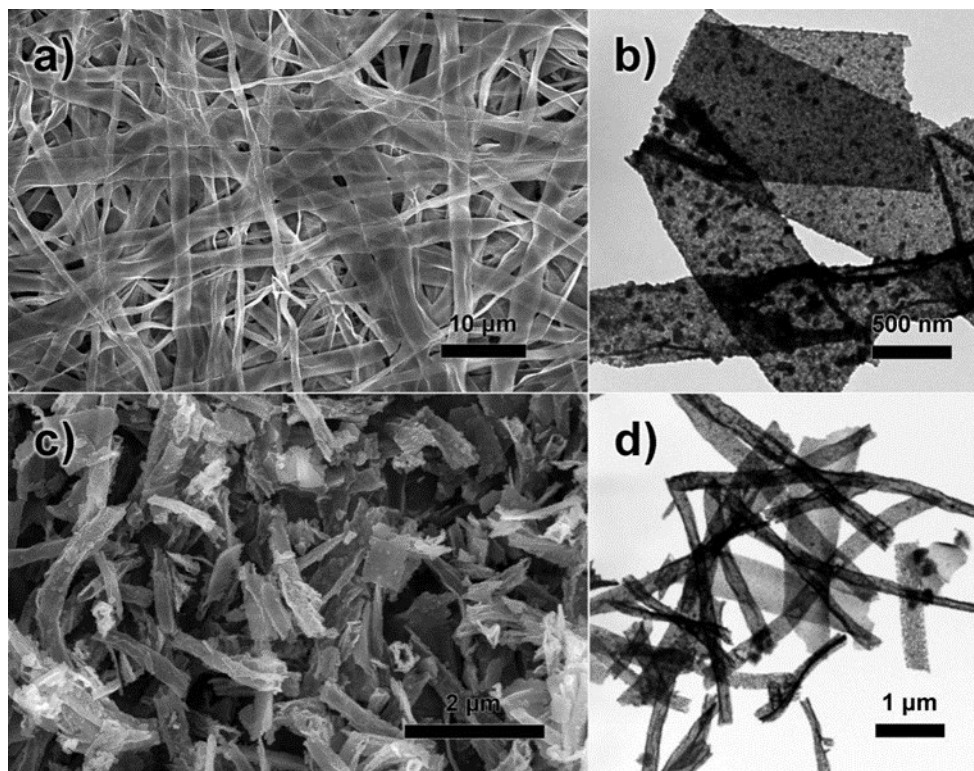

**Figure S3.** (a, b) SEM and TEM images of MnCo<sub>2</sub>O<sub>4</sub> nanobelts that are synthesized with the concentrations of both PVP and metal salts of 10 wt%; (c, d) SEM and TEM images of MnCo<sub>2</sub>O<sub>4</sub> nanobelts that are synthesized with the concentrations of PVP and metal salts of 10 wt% and 5 wt% respectively.

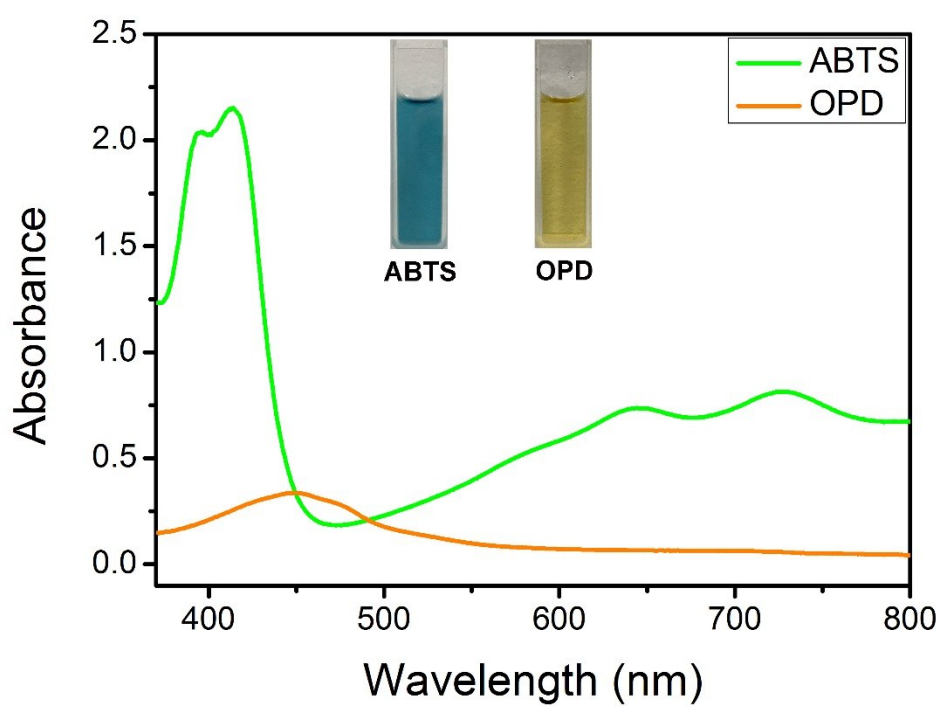

**Figure S4.** UV-vis absorption spectrum of the oxidized ABTS and OPD in acetate buffer solution (pH=4.0) and corresponding optical photographs.

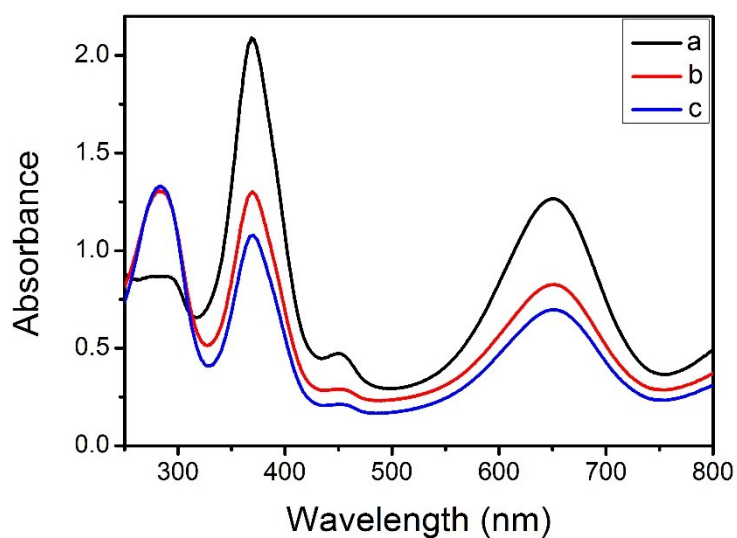

**Figure S5.** Dependence of the oxidase-like activity on the ratio of spinning solutions. Oxidase-like activity of (a) hollow  $\text{MnCo}_2\text{O}_4$  nanofibers that are synthesized with the proportion of PVP and metal salts at 8.8 wt% and 5 wt%, (b)  $\text{MnCo}_2\text{O}_4$  nanobelts that are synthesized with the concentrations of PVP and metal salts of 10 wt% and 5 wt% respectively and (c)  $\text{MnCo}_2\text{O}_4$  nanobelts that are synthesized with the concentrations of both PVP and metal salts of 10 wt%.

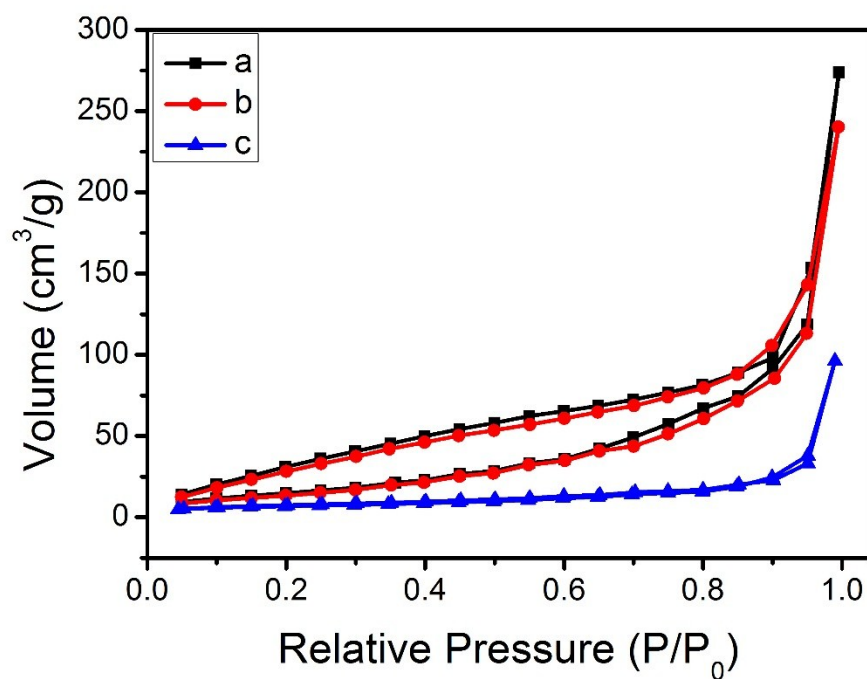

**Figure S6.** Nitrogen adsorption-desorption isotherms of (a) hollow  $\text{MnCo}_2\text{O}_4$  nanofibers that are synthesized with the proportion of PVP and metal salts at 8.8 wt% and 5 wt%, (b)  $\text{MnCo}_2\text{O}_4$  nanobelts that are synthesized with the concentrations of PVP and metal salts of 10 wt% and 5 wt% respectively and (c)  $\text{MnCo}_2\text{O}_4$  nanobelts that are synthesized with the concentrations of both PVP and metal salts of 10 wt%.
